# Supplementary material for: Encapsulated essential oil-based nanoemulsion beads: a green innovation for storage pest control against Tribolium castaneum
Source: Royal Society of Chemistry journal article supplement (doi:10.1039/d6ra02377k), 2026-05-06
Supplement: d6ra02377k1.pdf [file d6ra02377k1.pdf]

## Drug release kinetics study

The *in-vitro* drug release study for encapsulated Biopolymer beads (CNN, CLN, EGN Beads) under stable Ph 7 and ionic strength. For the analysis, 1g of beads is dispersed in 1X PBS buffer (100ml) each time, and the taken volume is replaced with fresh medium. Drug release data was collected at different intervals of time (0,1,2,4,6,8,12,24,36,48,60,72,84,96,108,120 hrs) and examined under UV-Vis spectrophotometer. Based on the absorbance value, maximum drug release values were calculated.

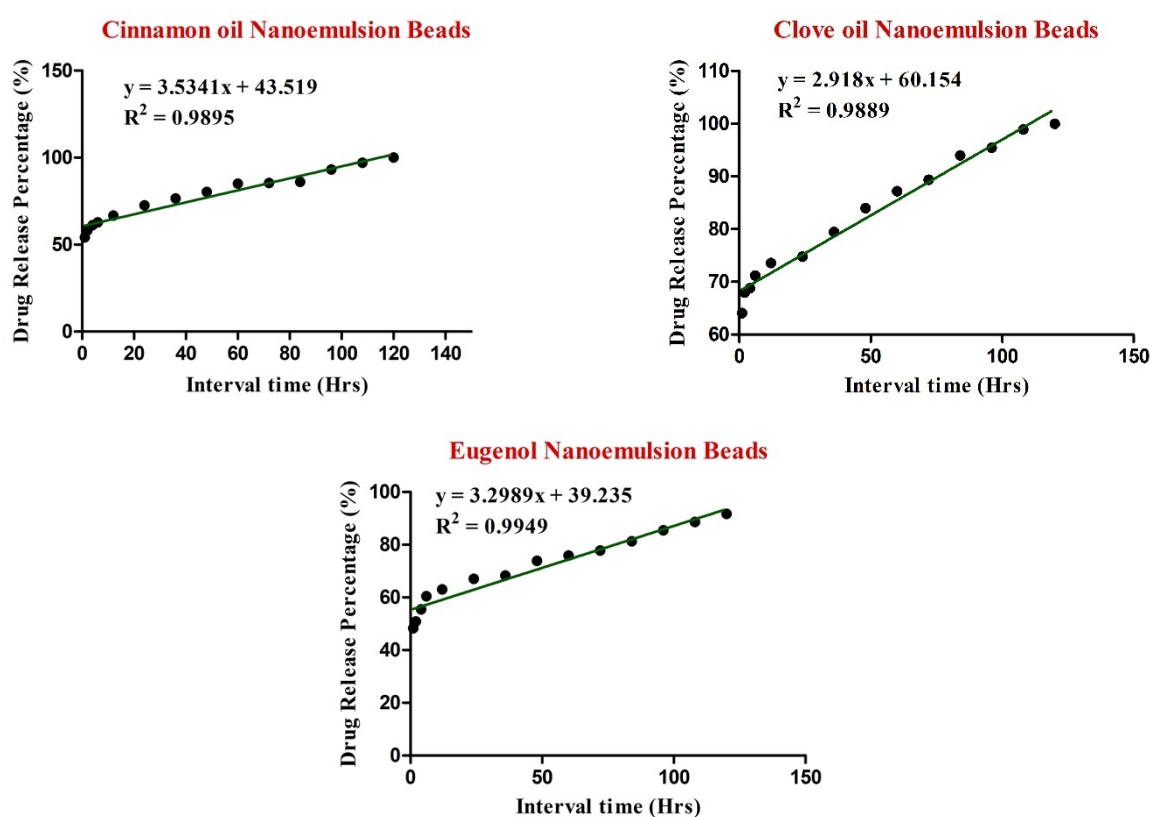

Fig. S1: Release kinetics of the nanoemulsion beads over a period of 150 hrs.

The cumulative drug release (CDR) that is the amount of nanoemulsion released during a period of 150 hrs is calculated based on the following formula

$$\text{CDR \%} = \frac{\text{Absorbance value at time (t)}}{\text{Total amount of drug encapsulated with delivery system}} \times 100$$

## Dose dependent curve

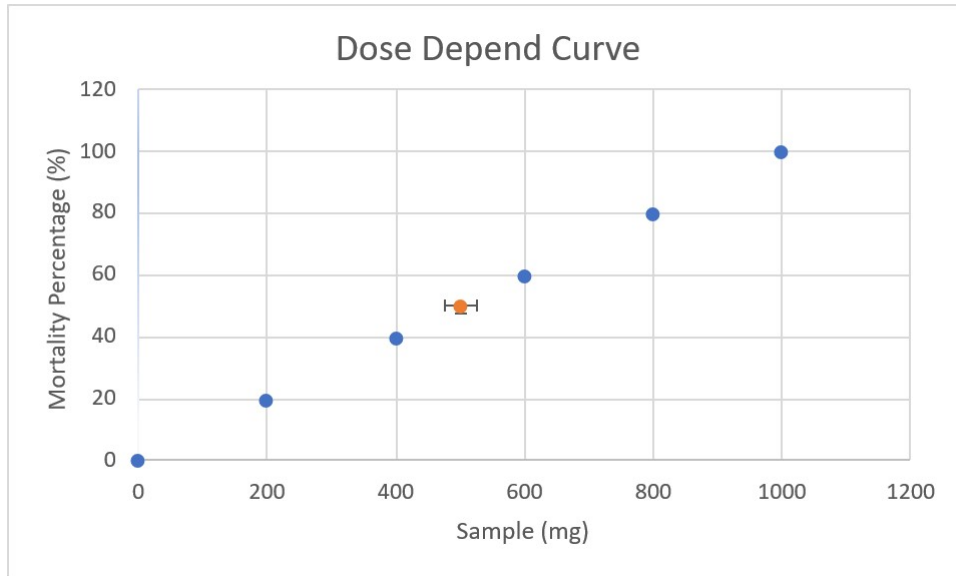

Fig. S2: Dose dependent curve

***In-vitro* statistical assessment analysis**

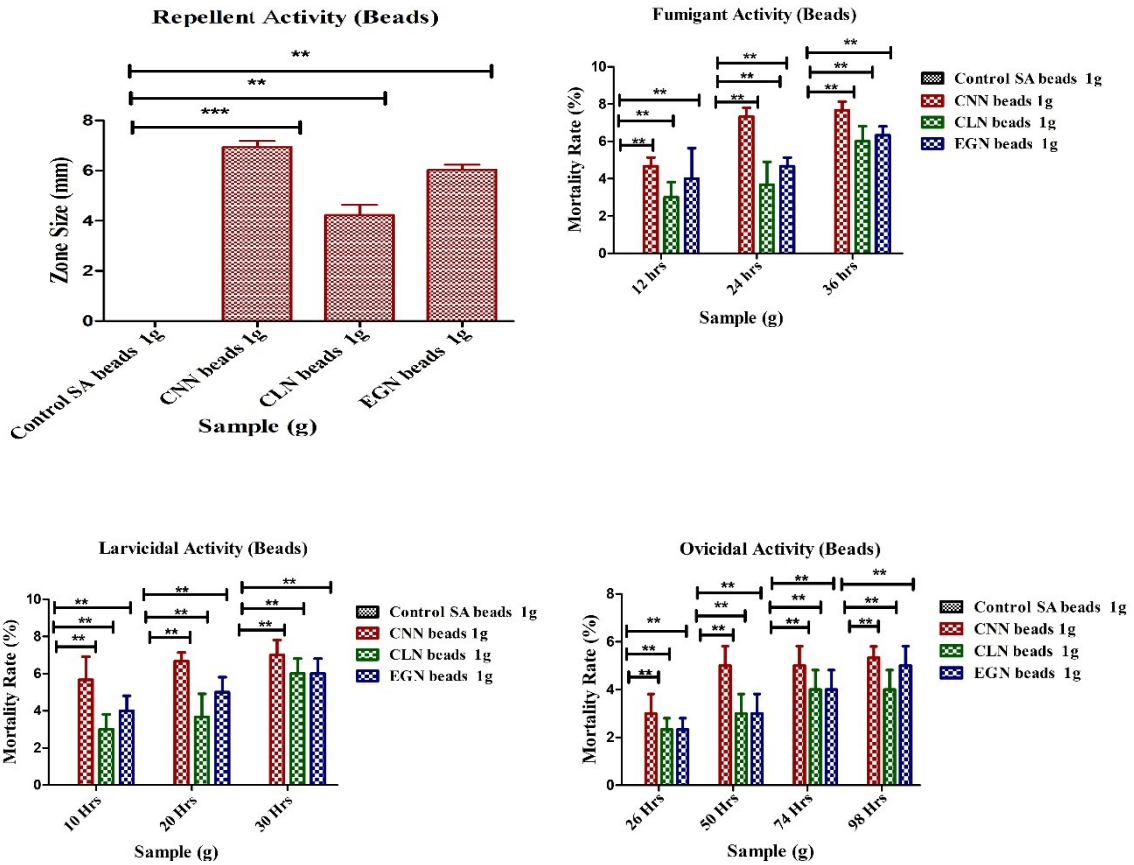

Fig. S3: Statistical analysis of invitro assessment of NEs beads against *T. castaneum*

**Table S1: Cinnamon nanoemulsion beads release kinetics**

| <b>S.NO</b> | <b>Interval time (Hrs)</b> | <b>Drug Released Percentage (%)</b> | <b>Drug Remaining Percentage (%)</b> |
|-------------|----------------------------|-------------------------------------|--------------------------------------|
| 1           | 1                          | 54.15                               | 45.85                                |
| 2           | 2                          | 58.17                               | 41.82                                |
| 3           | 4                          | 61.18                               | 38.86                                |
| 4           | 6                          | 62.74                               | 37.16                                |
| 5           | 12                         | 66.74                               | 33.25                                |
| 6           | 24                         | 72.56                               | 27.43                                |
| 7           | 36                         | 76.56                               | 23.43                                |
| 8           | 48                         | 80.32                               | 19.60                                |
| 9           | 60                         | 85.10                               | 14.89                                |
| 10          | 72                         | 85.46                               | 14.54                                |
| 11          | 84                         | 86.02                               | 13.97                                |
| 12          | 96                         | 93.14                               | 6.85                                 |
| 13          | 108                        | 97.00                               | 2.99                                 |
| 14          | 120                        | 100                                 | 0                                    |

**Table S2: Clove oil nanoemulsion beads**

| <b>S.NO</b> | <b>Interval time (Hrs)</b> | <b>Drug Released Percentage (%)</b> | <b>Drug Remaining Percentage (%)</b> |
|-------------|----------------------------|-------------------------------------|--------------------------------------|
| 1           | 1                          | 64.06                               | 35.97                                |

|    |     |       |       |
|----|-----|-------|-------|
| 2  | 2   | 67.93 | 32.09 |
| 3  | 4   | 68.75 | 31.24 |
| 4  | 6   | 71.20 | 28.79 |
| 5  | 12  | 73.56 | 26.73 |
| 6  | 24  | 74.78 | 25.21 |
| 7  | 36  | 79.44 | 20.55 |
| 8  | 48  | 83.97 | 16.02 |
| 9  | 60  | 87.19 | 12.80 |
| 10 | 72  | 89.33 | 10.66 |
| 11 | 84  | 93.98 | 6.01  |
| 12 | 96  | 95.43 | 4.56  |
| 13 | 108 | 98.87 | 1.12  |
| 14 | 120 | 99.98 | 0.02  |

**Table S3: Eugenol nanoemulsion beads**

| <b>S.NO</b> | <b>Interval time (Hrs)</b> | <b>Drug Released Percentage (%)</b> | <b>Drug Remaining Percentage (%)</b> |
|-------------|----------------------------|-------------------------------------|--------------------------------------|
| 1           | 1                          | 48.29                               | 51.70                                |
| 2           | 2                          | 50.90                               | 49.09                                |
| 3           | 4                          | 55.45                               | 44.54                                |
| 4           | 6                          | 60.44                               | 38.55                                |
| 5           | 12                         | 63.01                               | 36.98                                |

|    |     |       |       |
|----|-----|-------|-------|
| 6  | 24  | 67.07 | 32.99 |
| 7  | 36  | 68.28 | 31.71 |
| 8  | 48  | 73.88 | 26.11 |
| 9  | 60  | 75.91 | 24.08 |
| 10 | 72  | 77.77 | 22.22 |
| 11 | 84  | 81.32 | 18.67 |
| 12 | 96  | 85.49 | 14.50 |
| 13 | 108 | 88.58 | 11.41 |
| 14 | 120 | 91.66 | 8.33  |

**Table S4: The optimization of the essential oil concentration**

| <b>Final Volume</b> | <b>Essential Oil (<math>\mu\text{L}</math>)</b> | <b>Surfactant (<math>\mu\text{L}</math>)</b> | <b>Water (<math>\mu\text{L}</math>)</b> |
|---------------------|-------------------------------------------------|----------------------------------------------|-----------------------------------------|
| <b>1 mL</b>         | 40                                              | 100                                          | 880                                     |
| <b>2 mL</b>         | 80                                              | 200                                          | 1760                                    |
| <b>3 mL</b>         | 120                                             | 300                                          | 2640                                    |
| <b>4 mL</b>         | 160                                             | 400                                          | 3520                                    |
| <b>5 mL</b>         | 200                                             | 500                                          | 4400                                    |
| <b>6 mL</b>         | 240                                             | 600                                          | 5280                                    |
| <b>7 mL</b>         | 280                                             | 700                                          | 6160                                    |
| <b>8 mL</b>         | 320                                             | 800                                          | 7040                                    |
| <b>9 mL</b>         | 360                                             | 900                                          | 7920                                    |
| <b>10 mL</b>        | 400                                             | 1000                                         | 8800                                    |

**Table S5: GC-MS chromatogram of CNN, CLN and EGN with retention time**

| Essential Oil Beads          | Retention time          | Compounds          | Mass | Structure                                                                           |
|------------------------------|-------------------------|--------------------|------|-------------------------------------------------------------------------------------|
| <b>Cinnamon nanoemulsion</b> | 9.29, 10.10             | Eugenol            | 164  | 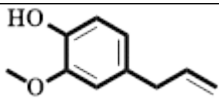 |
| <b>Clove nanoemulsion</b>    | 10.11, 11.38            | Beta-Caryophyllene | 204  |  |
|                              | 9.11, 9.29, 10.57       | Eugenol            | 164  |  |
| <b>Eugenol nanoemulsion</b>  | 9.02, 9.15, 9.30, 11.48 | Eugenol            | 164  |  |
